# Supplementary material for: A promiscuous ancestral enzyme´s structure unveils protein variable regions of the highly diverse metallo-β-lactamase family
Source: PubMed Central journal article supplement (PMC7846560; doi:10.1038/s42003-021-01671-8), 2021-01-29
Supplement: 42003_2021_1671_MOESM2_ESM.pdf [file 42003_2021_1671_MOESM2_ESM.pdf]

## Description of Additional Supplementary Files

**File name:** Supplementary Data S1

**Description:** Results of the structural searches performed with mTM-align and the DALI servers.

**File name:** Supplementary Data S2

**Description:** Data underlying Figure 3 and Figure 5a and b.
